# Supplementary material for: Mass Spectrometry Imaging as a Tool to Investigate Region Specific Lipid Alterations in Symptomatic Human Carotid Atherosclerotic Plaques
Source: MDPI journal article supplement (doi:10.3390/metabo11040250), 2021-04-18
Supplement: s1 [file s1]

## Supplementary Material 1

Histologic characterization of atherosclerosis plaques, based on hematoxylin and eosin staining and on Masson's Trichrome staining; annotated hematoxylin and eosin stained tissues (orange: Macrophages, cyan: Outer VSMCs; green: Inner VSMCs; yellow: Collagen; black: Lipid-necrotic core; brown: Hemorrhage; purple: Calcification).

### Patient 1

Type VI plaque (AHA); it is a likely thick ( $> 1 \mu\text{m}$ , i.e.,  $322 \mu\text{m}$ ) cap fibroatheroma, with intra-plaque hemorrhage and calcified foci. The cap is not clearly visible in an area close to a calcification.

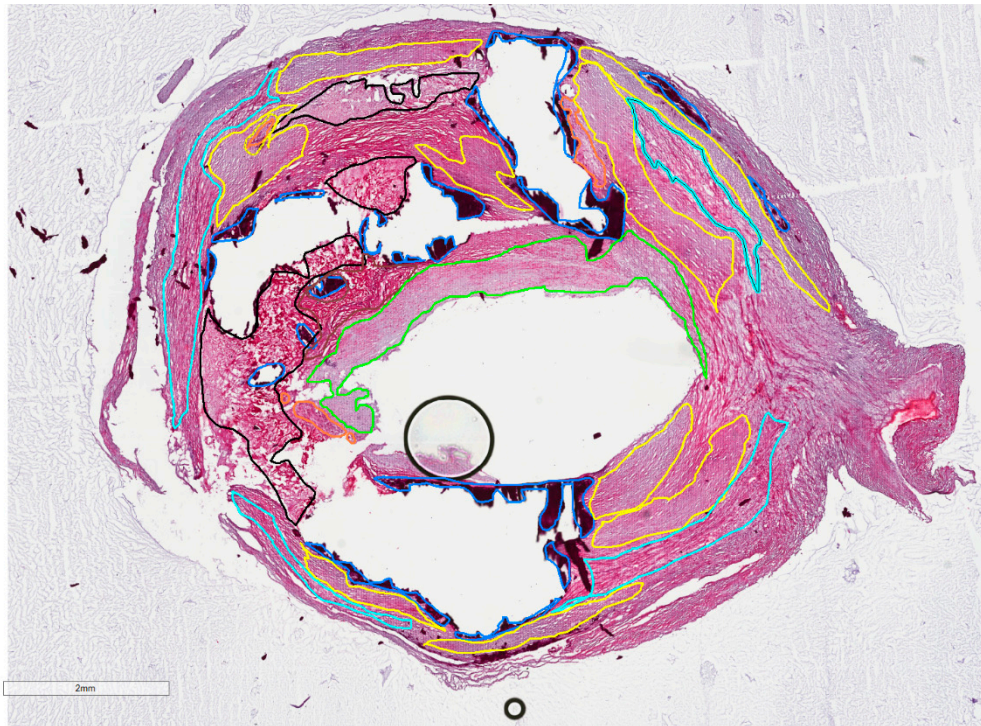

**Figure S1.** Annotated histological image of Patient 1.

### Patient 2.

It is a Type Va plaque (AHA): fragments of an atherosclerotic plaque, recalling a fibroatheroma. Fibrous cap cannot be evaluated because of plaque fragmentation. It is characterized by a lipidic core and a fibrotic component; thrombus or intra-plaque hemorrhage are not evident (it could be a stable or non-vulnerable plaque based on the morphology, but such a definition is based on fibrous cap thickness  $> 165 \mu\text{m}$ ).

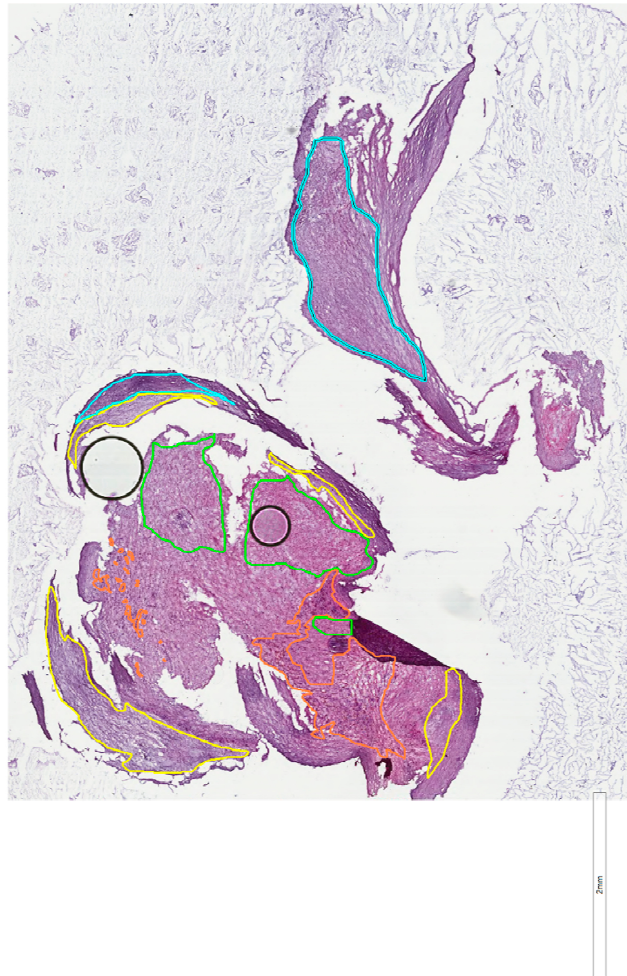

**Figure S2.** Annotated histological image of Patient 2.

### Patient 3

Type III (intermediate) plaque (AHA): a plaque that is mainly constituted by fibrous (or fibro-muscular) tissue with a limited and predominantly intracellular lipidic component; little stenosis (non critical stenosis on this slide). The hemorrhagic and necrotic areas close to the lumen could represent fibrino-ematic stratifications. It looks like a stable (non-vulnerable) plaque.

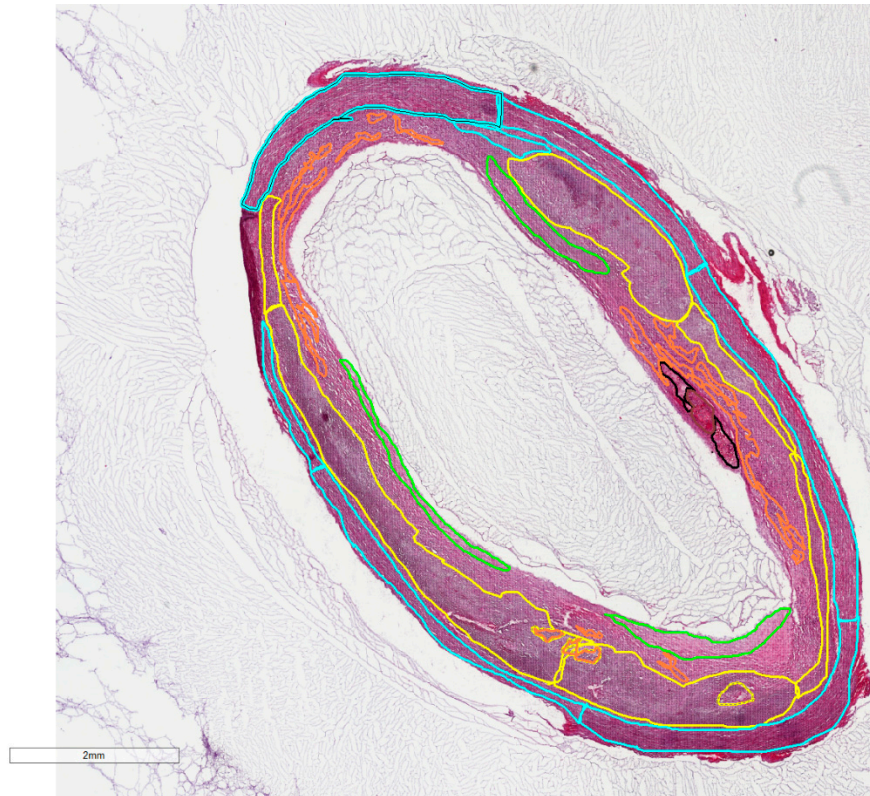

**Figure S3.** Annotated histological image of Patient 3.

#### Patient 4

Type VI plaque (AHA); it is a thick ( $> 165 \mu\text{m}$ , i.e.,  $175 \mu\text{m}$ ) cap fibroatheroma, with intra-plaque hemorrhage.

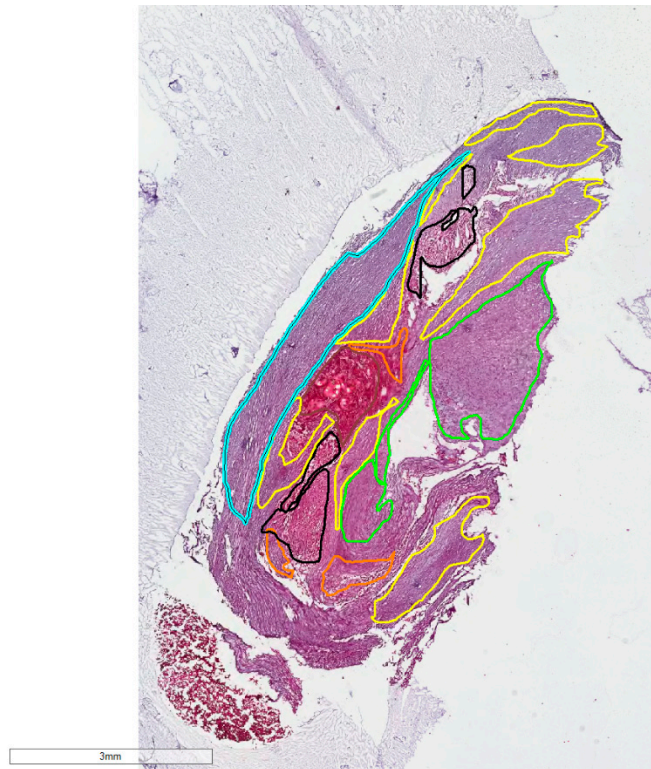

**Figure S4.** Annotated histological image of Patient 4.

### Patient 5

Type VI plaque (AHA): a thin cap Fibroatheroma, apparently ulcerated with micro-thrombotic depositions and hemorrhage, focal calcification.

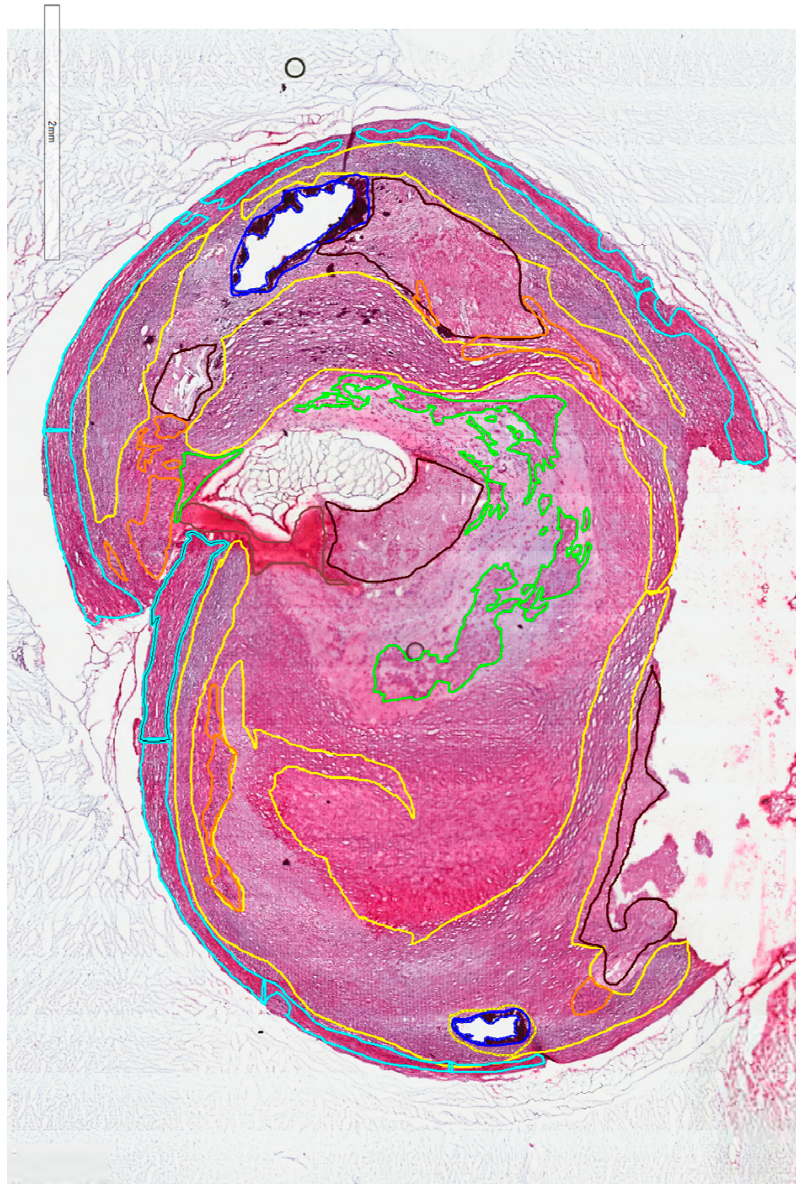

**Figure S5.** Annotated histological image of Patient 5.

### Patient 6

It is a sub-occlusive Type VI plaque (AHA), i.e., a fibroatheroma with intra-plaque hemorrhage; it has a thick ( $> 165 \mu\text{m}$ , i.e.,  $340 \mu\text{m}$ ) cap.

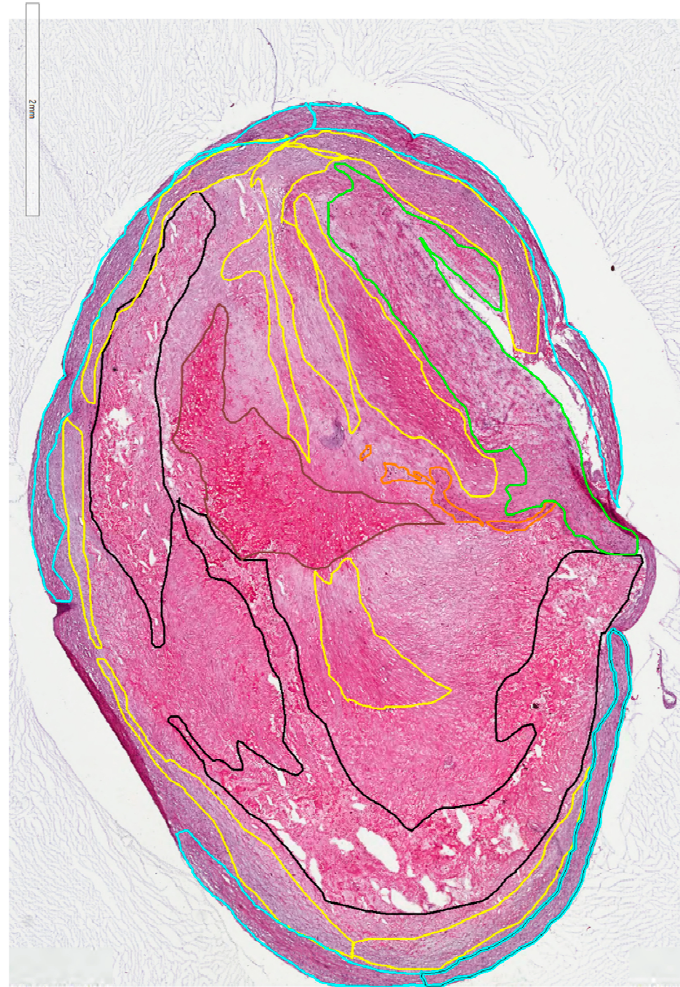

**Figure S6.** Annotated histological image of Patient 6.

### Presence of the different regions in the plaques

**Table S1.** Presence of the different regions in the plaques.

| Patient             | 1 | 2 | 3 | 4 | 5 | 6 |
|---------------------|---|---|---|---|---|---|
| Macrophages         | X | X | X | X | X | X |
| VSMCs Inner         | X | X | X | X | X | X |
| VSMCs Outer         | X | X | X | X | X | X |
| Lipid-necrotic core | X |   | X | X | X | X |
| Collagen            | X | X | X | X | X | X |
| Hemorrhage          | X |   | X | X | X | X |
| Calcification       | X |   |   |   | X |   |
